# Supplementary material
Source: PubMed Central journal article supplement (PMC7018439)
Supplement: NIHMS1552320-supplement-Supplementary_Table_1.pdf [file NIHMS1552320-supplement-Supplementary_Table_1.pdf]

|                                                    | sdLDL-C < 25 mg/dL | sdLDL-C >25 mg/dL | P-value |
|----------------------------------------------------|--------------------|-------------------|---------|
| <b>CLINICAL CHARACTERISTICS</b>                    |                    |                   |         |
| <b>N</b>                                           | 65                 | 65                |         |
| Age (years)                                        | 56±12              | 59±9              | 0.18    |
| Gender (male)                                      | 40 (62%)           | 41 (63%)          | 1.0     |
| Ethnicity                                          |                    |                   | 0.46    |
| Caucasian (%)                                      | 45 (69%)           | 51 (78%)          |         |
| African-American (%)                               | 15 (23%)           | 10 (15%)          |         |
| <b>ETIOLOGY OF LIVER DISEASE</b>                   |                    |                   | 0.03    |
| Hepatitis C                                        | 32 (49%)           | 16(25%)           |         |
| Alcohol                                            | 6(9%)              | 9(14%)            |         |
| Nonalcoholic Steatohepatitis                       | 7(11%)             | 16(25%)           |         |
| Follow up time from liver transplantation (months) | 67±57              | 65±55             | 0.92    |
|                                                    |                    |                   |         |
| <b>CARDIOMETABOLIC CONDITIONS</b>                  |                    |                   |         |
| Body mass index (kg/m <sup>2</sup> )               | 27.8±5.1           | 30.5±6.0          | <0.05   |
| Diabetes (%)                                       | 17 (26%)           | 28(43%)           | 0.07    |
| Dyslipidemia (%)                                   | 16(25%)            | 36(55%)           | <0.01   |
| Hypertension (%)                                   | 48(74%)            | 58(89%)           | 0.02    |
| Obesity (%)                                        | 20(31%)            | 32(49%)           | 0.02    |
|                                                    |                    |                   |         |
| <b>LABORATORY PARAMATERS</b>                       |                    |                   |         |
| ALT (IU/L)                                         | 46±30              | 49±45             | 0.72    |
| AST (IU/L)                                         | 48±27              | 45±32             | 0.56    |
| Alkaline Phosphatase (IU/L)                        | 128±61             | 143±125           | 0.38    |
| Bilirubin, total (mg/dL)                           | 0.9±1.0            | 0.7±0.4           | 0.20    |
| Bilirubin, direct (mg/dL)                          | 0.4±0.3            | 0.3±0.3           | 0.32    |
|                                                    |                    |                   |         |
| <b>IMMUNOSUPPRESSANTS</b>                          |                    |                   | 0.37    |
| Cyclosporine (%)                                   | 19(29%)            | 22(34%)           |         |
| Rapamune (%)                                       | 42(65%)            | 36(55%)           |         |
| Tacrolimus (%)                                     | 10(15%)            | 17(26%)           |         |

**Supplementary Table 1:** Clinical characteristics of the cohort stratified based on sdLDL-C < 25 and sdLDL-C > 25
